# Supplementary material for: Nanoindentation analysis of the micromechanical anisotropy in mouse cortical bone
Source: PubMed Central journal article supplement (PMC5367284; doi:10.1098/rsos.160971), 2017-02-22
Supplement: rsos160971supp1.pdf [file rsos160971supp1.pdf]

**Table S1** Summary of the mean values and standard deviations of reduced elastic modulus and hardness found in this study together with their anisotropy ratios.

|                |                  | Proximal                   | Central                    | Distal                         |
|----------------|------------------|----------------------------|----------------------------|--------------------------------|
|                |                  | <i>N=18</i>                | <i>N=18</i>                | <i>N=18</i>                    |
| $E_r$<br>(GPa) | Transverse       | 11.8 (3.3)                 | 12.6 (3.2)                 | 12.4 (2.2)                     |
|                | Longitudinal     | 19.4 (3.0) <sup>***</sup>  | 20.1 (1.9) <sup>***</sup>  | 16.4 (3.0) <sup>***,##</sup>   |
|                | Anisotropy ratio | 1.72 (0.40)                | 1.75 (0.69)                | 1.34 (0.30)                    |
| $H$<br>(GPa)   | Transverse       | 0.53 (0.09)                | 0.53 (0.10)                | 0.52 (0.06)                    |
|                | Longitudinal     | 0.71 (0.09) <sup>***</sup> | 0.68 (0.08) <sup>***</sup> | 0.61 (0.10) <sup>**</sup> , ++ |
|                | Anisotropy ratio | 1.35 (0.27)                | 1.35 (0.47)                | 1.17 (0.19)                    |

\*\*\*:  $p < 0.001$  when compared to transverse values on the same region; \*\*:  $p < 0.01$  when compared to transverse values on the same region, ##:  $p < 0.01$  when compared to longitudinal values in proximal region and also to longitudinal values in central region; ++:  $p < 0.01$  when compared to longitudinal values in proximal region.
