# Supplementary material for: Nanoindentation analysis of the micromechanical anisotropy in mouse cortical bone
Source: PubMed Central journal article supplement (PMC5367284; doi:10.1098/rsos.160971), 2017-02-22

**Figure S1** Values of reduced modulus ( $E_r$ ) and hardness ( $H$ ) for each set of indentations in both transverse (left) and longitudinal (right) directions. P: proximal region; C: central region; D: distal region. Mxx: mouse number and right or left femur (e.g. M1L: mouse no. 1, left femur).

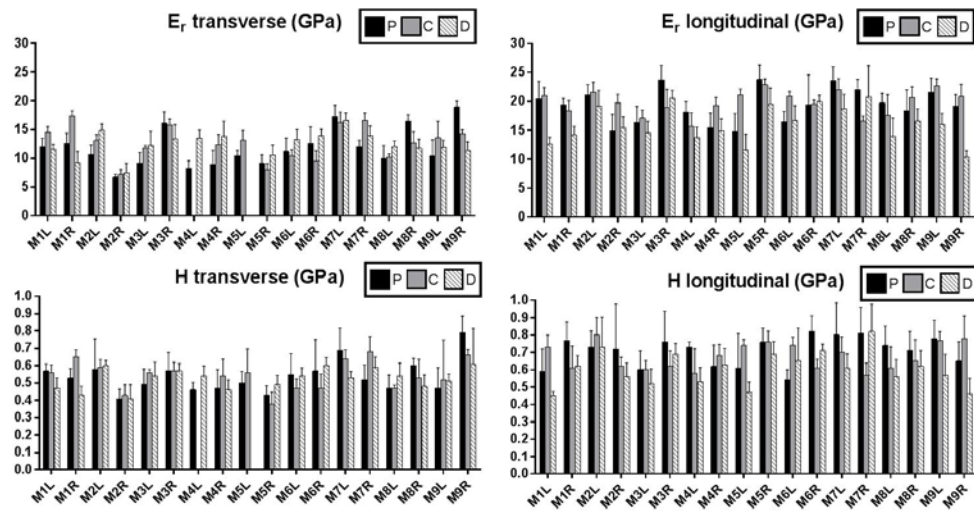

Supplement: rsos160971supp2.pdf [file rsos160971supp2.pdf]
